# Supplementary material for: Review of the factors influencing the motivation of community drug distributors towards the control and elimination of neglected tropical diseases (NTDs)
Source: PubMed Central journal article supplement (PMC5718409; doi:10.1371/journal.pntd.0006065), 2017-12-06
Supplement: pntd.0006065.s001.pdf [file pntd.0006065.s001.pdf]

**S1 Supporting Information: List of papers accepted for review in "Review of the factors influencing the motivation of community drug distributors towards the control and elimination of neglected tropical diseases (NTDs)"**

| No | Title                                                                                                                                                  | Authors                                        | Year | Countries                           |
|----|--------------------------------------------------------------------------------------------------------------------------------------------------------|------------------------------------------------|------|-------------------------------------|
| 1  | Sociocultural aspects of mass delivery of praziquantel in schistosomiasis control: The Abeokuta experience                                             | Adeneye AK, Akinwale OP, Idowu ET et al.       | 2007 | Nigeria                             |
| 2  | Monitoring community-directed treatment programmes for sustainability: lessons from the African Programme for Onchocerciasis Control (APOC)            | Amazigo UV, Obono OM, Dadzie KY et al          | 2002 | Uganda, Nigeria, Cameroon, Tanzania |
| 3  | The challenges of community-directed treatment with ivermectin (CDTI) within the African Programme for Onchocerciasis Control (APOC)                   | Amazigo UV, Brieger WR, Katarbarwa M et al.    | 2002 | Multiple                            |
| 4  | Factors associated with coverage in community-directed treatment with ivermectin for onchocerciasis control in Oyo State, Nigeria                      | Brieger WR, Otusamya SA, Oke GA et al.         | 2002 | Nigeria                             |
| 5  | Implementation and sustainability of Community-Directed Treatment of Onchocerciasis with ivermectin: a multicountry study                              | Edited by Brieger WR                           | 2000 | Nigeria, Ghana, Mali and Togo       |
| 6  | Data reporting constraints for the lymphatic filariasis mass drug administration activities in two districts in Ghana: A qualitative study             | da-Costa Vroom FB Aryeetey R, Boateng R et al. | 2015 | Ghana                               |
| 7  | Factors associated with coverage of praziquantel for schistosomiasis control in the community-direct intervention (CDI) approach in Mali (West Africa) | Dabo A, Bary B, Kouriba B et al.               | 2013 | Mali                                |

|    |                                                                                                                                                                                        |                                                                 |      |          |
|----|----------------------------------------------------------------------------------------------------------------------------------------------------------------------------------------|-----------------------------------------------------------------|------|----------|
| 8  | Factors affecting the attrition of community-directed distributors of ivermectin, in an onchocerciasis-control programme in the Imo and Abia states of south-eastern Nigeria           | Emukah EC, Enyinnaya U, Olaniran NS et al.                      | 2008 | Nigeria  |
| 9  | A mixed methods approach to evaluating community drug distributor performance in the control of neglected tropical diseases                                                            | Fleming FM, Matovu F, Hansen KS and Webster JP                  | 2016 | Uganda   |
| 10 | Re-assessing community-directed treatment: evidence from Mazabuka District, Zambia                                                                                                     | Halwindi H, Magnussen P, Siziya S, Meyrowitsch DW and Olsen A   | 2015 | Zambia   |
| 11 | Mass drug administration for lymphatic filariasis elimination in a coastal state of India: a study on barriers to coverage and compliance                                              | Hussain MA, Sitha AK, Swain S, Kadam S and Pati S               | 2014 | India    |
| 12 | Involvement and performance of women in community-directed treatment with ivermectin for onchocerciasis control in Rukungiri District, Uganda                                          | Katararwa MN<br>Habomugisha P and Agunyo S                      | 2002 | Uganda   |
| 13 | Involvement of women in community-directed treatment with ivermectin for the control of onchocerciasis in Rukungiri district, Uganda: A knowledge, attitude and practice study         | Katararwa M,<br>Habomugisha P,<br>Ndyomugenyi R and Agunyo S    | 2001 | Uganda   |
| 14 | Community-directed interventions strategy enhances efficient and effective integration of health care delivery and development activities in rural disadvantaged communities of Uganda | Katararwa MN,<br>Habomugisha P,<br>Richards Jr FO and Hopkins D | 2005 | Uganda   |
| 15 | Community-directed health (CDH) workers enhance the performance and sustainability of CDH programmes: experience from ivermectin distribution in Uganda                                | Katararwa MN and Richards Jr FO                                 | 2001 | Uganda   |
| 16 | Dilemmas of community-directed mass drug administration for lymphatic filariasis control: a qualitative study from urban and rural Tanzania                                            | Kisoka W, Mushi D, Meyrowitsch DW et al.                        | 2016 | Tanzania |

|    |                                                                                                                                                                                                       |                                                           |      |                                           |
|----|-------------------------------------------------------------------------------------------------------------------------------------------------------------------------------------------------------|-----------------------------------------------------------|------|-------------------------------------------|
| 17 | Effectiveness of different approaches to mass delivery of praziquantel among school-aged children in rural communities in Nigeria                                                                     | Mafe MA, Appelt B, Adewale B et al.                       | 2005 | Nigeria                                   |
| 18 | The Role of Personal Opinions and Experiences in Compliance with Mass Drug Administration for Lymphatic Filariasis Elimination in Kenya                                                               | Njomo DW, Amuyunzu-Nyamongo M, Magambo JK and Njenga SM   | 2012 | Kenya                                     |
| 19 | Predictors of compliance with community-directed ivermectin treatment in Uganda: quantitative results                                                                                                 | Nuwaha F, Okware J and Ndyomugyenye R                     | 2005 | Uganda                                    |
| 20 | Predictors for compliance with community directed ivermectin treatment in Bushenyi District of Uganda: qualitative results                                                                            | Nuwaha F, Okware J and Ndyomugyenye R                     | 2004 | Uganda                                    |
| 21 | Characteristics of effective Village Treatment Assistants: the Kongwa Trachoma Project                                                                                                                | O'Connor J, Lynch M, Vitale S and West S                  | 1999 | Tanzania                                  |
| 22 | Community Health Workers' Experiences and Perspectives on Mass Drug Administration for Schistosomiasis Control in Western Kenya: The SCORE Project                                                    | Omedo MO, Matey EJ, Awiti A et al.                        | 2012 | Kenya                                     |
| 23 | Does mass drug administration for the integrated treatment of neglected tropical diseases really work? Assessing evidence for the control of schistosomiasis and soil-transmitted helminths in Uganda | Parker M and Allen T                                      | 2011 | Uganda                                    |
| 24 | Exploring Gender Dimensions of Treatment Programmes for Neglected Tropical Diseases in Uganda                                                                                                         | Rilkoff H, Tukahebwa EM, Fleming FM, Leslie J and Cole DC | 2013 | Uganda                                    |
| 25 | A multi-centre study of community-directed ivermectin distributors' (CDDs') involvement in other healthcare and development programme activities in Cameroon, Togo, Sudan, Nigeria and Uganda         | Sama MT, Homeida M, Ngang P et al.                        | 2003 | Cameroon, Togo, Sudan, Nigeria and Uganda |
| 26 | Factors Associated with Ivermectin Non-Compliance and Its Potential Role in Sustaining <i>Onchocerca volvulus</i> Transmission in the West                                                            | Senyonjo L, Oye J, Bakajika D et al.                      | 2016 | Cameroon                                  |

|    |                                                                                                                                                                      |                                     |      |          |
|----|----------------------------------------------------------------------------------------------------------------------------------------------------------------------|-------------------------------------|------|----------|
|    | Region of Cameroon                                                                                                                                                   |                                     |      |          |
| 27 | Contribution and performance of female Community-Directed Distributors in the treatment of onchocerciasis with Ivermectin in Sub-Saharan Africa: a systematic review | Vouking MZ, Tamo VC and Tadenfok CN | 2015 | Multiple |
| 28 | Factors Affecting Community Participation in the CDTI Program in Morogoro, Tanzania                                                                                  | York KJ, Kabole I, Mrisho M et al.  | 2014 | Tanzania |
